# Supplementary material for: Perfused Three-dimensional Organotypic Culture of Human Cancer Cells for Therapeutic Evaluation
Source: PubMed Central journal article supplement (PMC5573358; doi:10.1038/s41598-017-09686-0), 2017-08-25

# **Perfused Three-dimensional Organotypic Culture of Human Cancer Cells for Therapeutic Evaluation**

Xiao Wan<sup>1</sup>, Steven Ball<sup>2</sup>, Frances Willenbrock<sup>1</sup>, Shaoyang Yeh<sup>3</sup>, Nikola Vlahov<sup>1</sup>, Delia Koennig<sup>1</sup>, Marcus Green<sup>1</sup>, Graham Brown<sup>1</sup>, Sanjeev Jeyaretna<sup>4</sup>, Zhaohui Li<sup>3</sup>, Zhanfeng Cui<sup>3</sup>, Hua Ye<sup>3</sup>, Eric O'Neill<sup>1\*</sup>

<sup>1</sup> CRUK/MRC Oxford Institute of Radiation Biology, University of Oxford, ORCRB Research Building, Roosevelt Drive, Headington, OX3 7DQ, UK. <sup>2</sup> Oxford Instruments Nanoscience, Tubney Woods, Abingdon, Oxford, OX13 5QX, UK <sup>3</sup> Institute of Biomedical Engineering, Department of Engineering Science, University of Oxford, Old Road Campus Research Building, Headington, Oxford, OX3 7DQ, UK. <sup>4</sup> Department of Neurosurgery, John Radcliffe hospital, Headington, Oxford OX3 9DU, UK.

\* Correspondence to: Dr Eric O'Neill, [eric.oneill@oncology.ox.ac.uk](mailto:eric.oneill@oncology.ox.ac.uk)

### **Supplementary information and tables s1-s3.**

**Figure s1.** Perfusion eliminated the necrotic core cause by insufficient nutrient and oxygen supply in 3D multicellular spheroids formed by lung cancer cells H1299. It is interesting that tubulin expression was also increased in the perfusion group.

**Figure s2.** HUVECS grown on Matrigel under static or perfused conditions as indicated.

**Figure s3. a.** Live cell staining of SY5Y cells (CellTracker Green) and human umbilical vein endothelial cells (HUVECs) (CellTracker Orange) co-cultures on Matrigel. **b,** time course of co-culture over 14 days separated images for Figure 6a. Scale bar: 500µm.

**Figure s4.** HUVEC and OVCAR8 cells co-cultured in the bioreactor statically at day 14. HUVECs stained with living cell staining CellTracker Orange (red) and OVCAR8 stained with CellTracker Green (ThermoFisher, UK), co-cultured in the bioreactor statically at day 14. Microtumours were co-stained for cleaved caspase - 3 (rabbit anti-human, CST, UK; goat anti-rabbit IgG labelled with Alexa 633). All the samples were fixed as described previously. Scale bar: 100µm.

**Figure s5.** GBM microtumours were formed by embedding glioblastoma cell line GaMG cells in Matrigel, and then the 3D structures were extracted as described in Materials and Methods, followed by staining with Astrocyte differentiation glial fibrillary acidic protein (GFAP, red fluorescence) and pluripotency marker Nanog (green fluorescence). Scale bar: 100µm.

**Table s1.** Medium information for 2D cell expansion prior to 3D culture module

| Names                            | Cell types                         | Basic medium                             | Supplements                                                                                                                                                                                                                                        |
|----------------------------------|------------------------------------|------------------------------------------|----------------------------------------------------------------------------------------------------------------------------------------------------------------------------------------------------------------------------------------------------|
| SY5Y (ATCC)                      | Neuroblastoma cell line            | DMEM (Gibco, UK)                         | 10 % (v/v) foetal bovine serum (FBS) (Gibco, UK) and 100 U penicillin/ml and 100 lg streptomycin/ml (Gibco, UK)                                                                                                                                    |
| GAMG (DSMZ)                      | Glioblastoma cell line             | DMEM (Gibco, UK)                         | 10 % (v/v) foetal bovine serum (FBS) (Gibco, UK) and 100 U penicillin/ml and 100 lg streptomycin/ml (Gibco, UK), 4x NEAA                                                                                                                           |
| Human primary glioblastoma cells | Human primary glioblastoma cells   | Neural Basal Medium (Gibco, UK)          | Neurobasal medium, 3mM glutamine, 1x B27 supplement, 0.5x N2 supplement, 2µg/ml heparin, 50 U/ml penicillin and 50 µg/ml streptomycin, 250µg/ml amphotericin B, 20ng/ml rec (all Gibco), human EGF (Peprotech), 20ng/ml rec human FGF (Peprotech). |
| OVCAR8 (NIH)                     | Ovarian cancer cell line           | DMEM (Gibco, UK)                         | 10 % (v/v) foetal bovine serum (FBS) (Gibco, UK) and 100 U penicillin/ml and 100 lg streptomycin/ml (Gibco, UK)                                                                                                                                    |
| H1299 (ATCC)                     | Lung cancer cell line              | DMEM (Gibco, UK)                         | 10 % (v/v) foetal bovine serum (FBS) (Gibco, UK) and 100 U penicillin/ml and 100 lg streptomycin/ml (Gibco, UK)                                                                                                                                    |
| HUVECs (Lonza UK)                | Primary vascular endothelial cells | Endothelial Basal Medium – 2 (Lonza, UK) | Endothelial Growth Medium – 2 (Lonza, UK)                                                                                                                                                                                                          |

**Table s2.** Technical comparison of microtumours in this study

| Models                  | Hydrogel used                          | Polymerisation                                                   | Description                                                                                                 |
|-------------------------|----------------------------------------|------------------------------------------------------------------|-------------------------------------------------------------------------------------------------------------|
| Multicellular spheroids | Agarose (60µL)                         | At room temperature<br>for 30 min                                | Lower cost;<br>Lack of extracellular<br>matrix                                                              |
| Matrigel sandwich       | 4-well bioreactor<br>75µL Matrigel     | Bottom layer<br>polymerised at 37°C for<br>30min; then top layer | Medium cost;<br>Laminin-rich<br>extracellular matrix;<br>tubular structure<br>maintained; lower 3D<br>depth |
|                         | 10-well<br>bioreactor 15µL<br>Matrigel | with cell suspension at<br>37°C overnight.                       |                                                                                                             |
| Matrigel embedded       | 4-well bioreactor<br>100µL Matrigel    | At 37°C for 30min                                                | Higher cost; Laminin-<br>rich extracellular<br>matrix; no complicated<br>structure; high 3D<br>depth.       |
|                         | 10-well<br>bioreactor 25µL<br>Matrigel |                                                                  |                                                                                                             |

**Table s3.** List for primary antibodies used in the immunofluorescence microscopy

| Functions                 | Antigen names         | Host species      | Supplier                        | Index                     |
|---------------------------|-----------------------|-------------------|---------------------------------|---------------------------|
| Pluripotency markers      | SOX2                  | Mouse anti-human  | Millipore (UK)                  | Fig. 5a; Fig. 6b          |
|                           | Nanog                 | Mouse anti-human  | Cell Signalling Technology (UK) | Fig. 8; Fig. s2           |
| Neuron differentiation    | $\beta$ – tubulin III | Rabbit anti-human | Biomass Antibodies (US)         | Fig. 5a; Fig. 6b; Fig. s1 |
| Astrocyte differentiation | GFAP                  | Rat anti-human    | Thermo-Fisher (UK)              | Fig. 8; Fig. s2           |

Figure s1

H1299

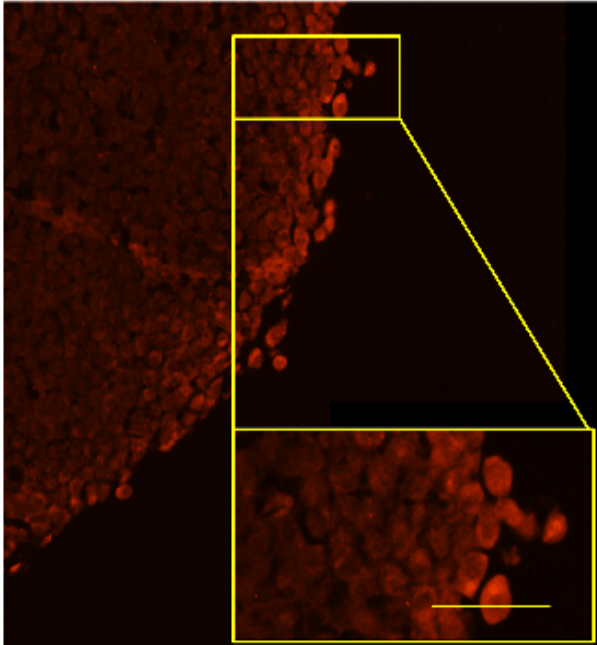

Static

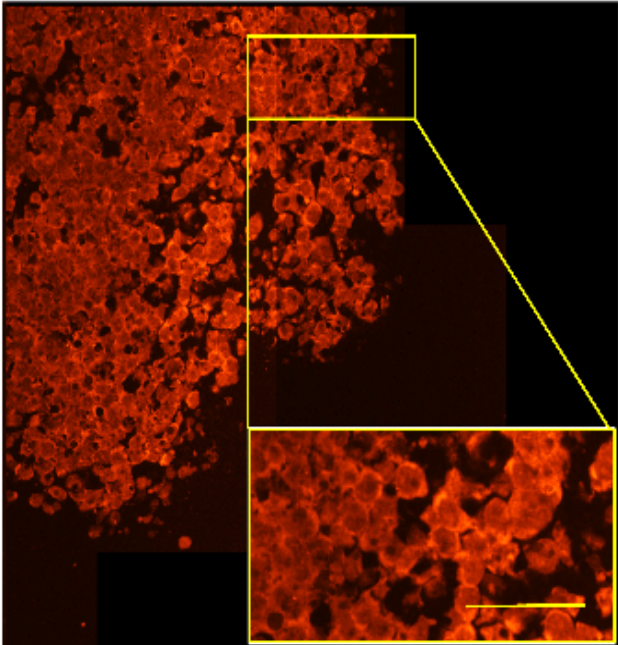

Perfusion

Figure s2

# HUVECs

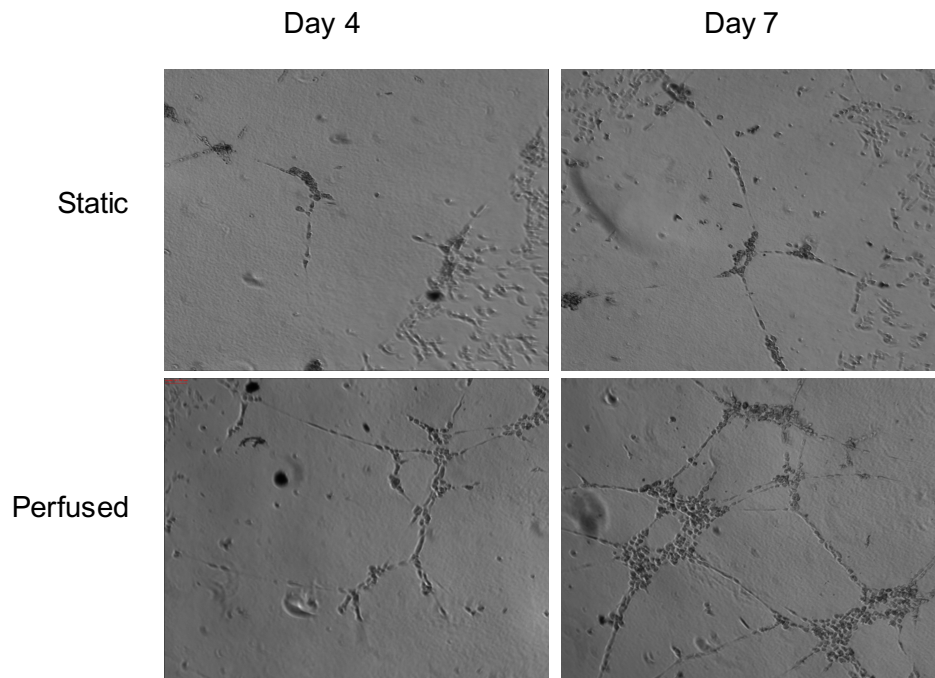

Figure s3

a

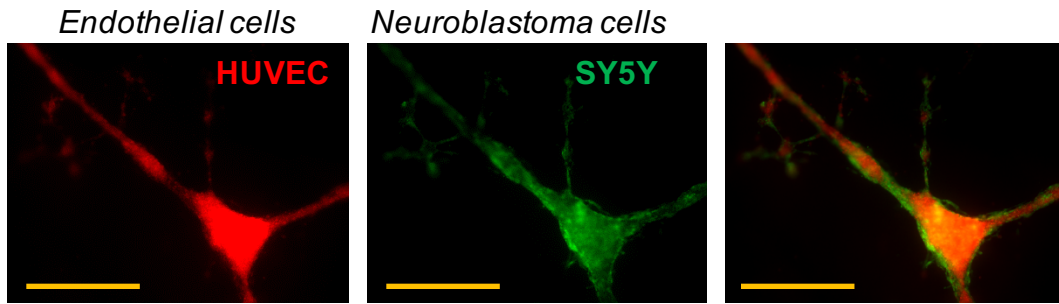

b

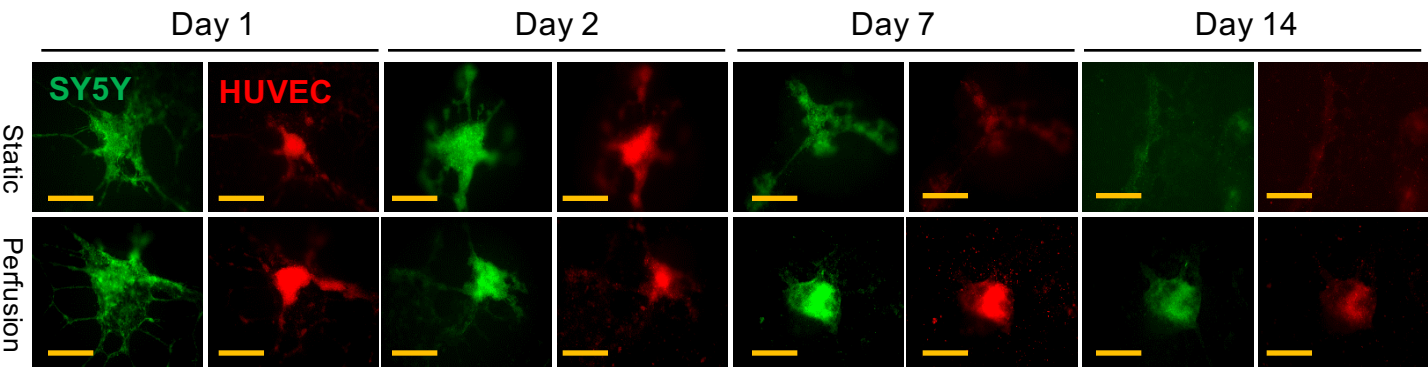



Figure s4

*HUVEC and OVCAR8 co-cultures*

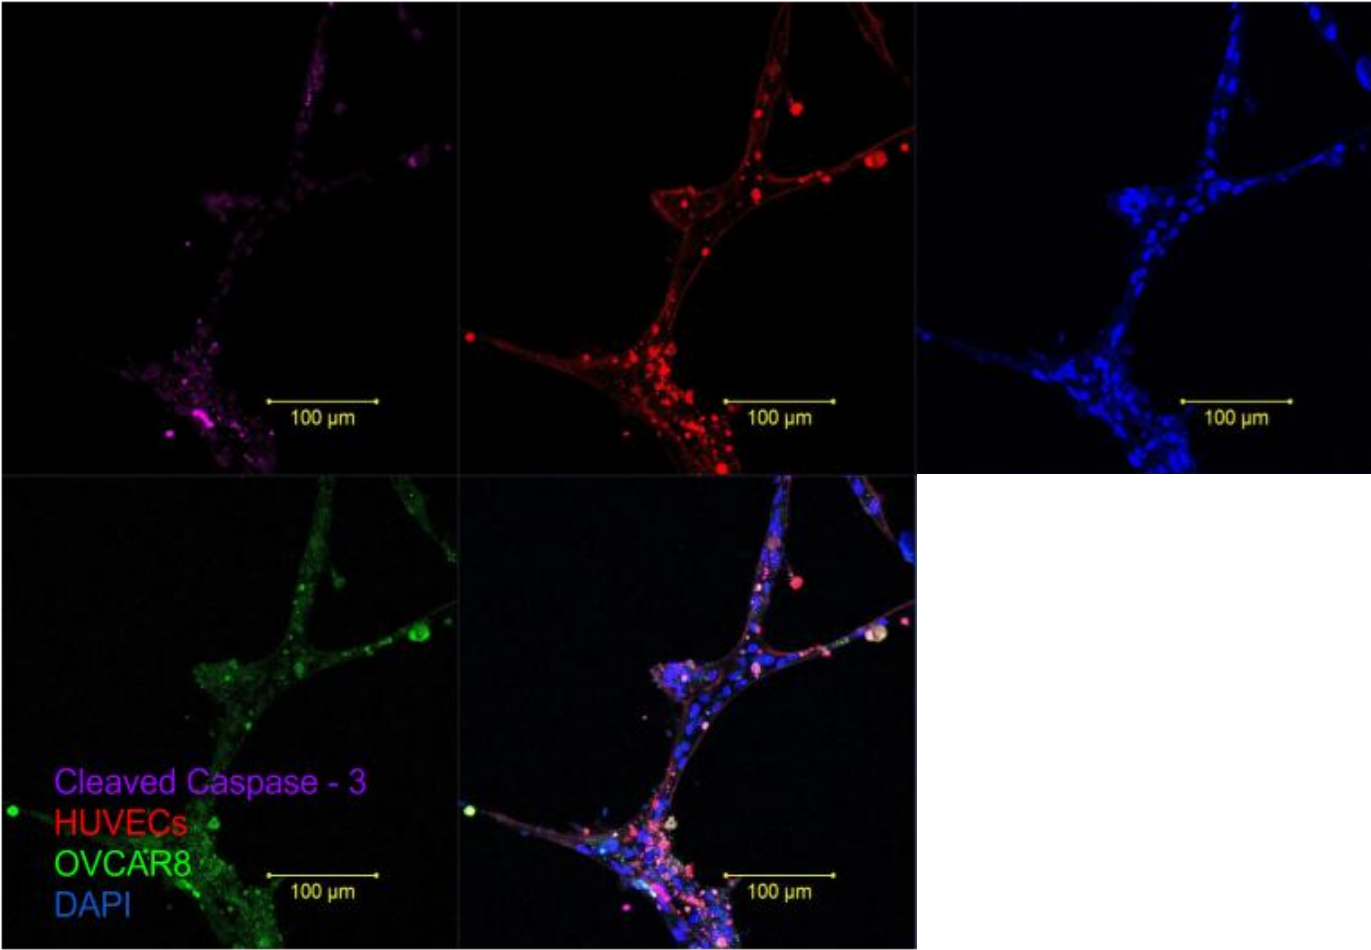

Figure s5

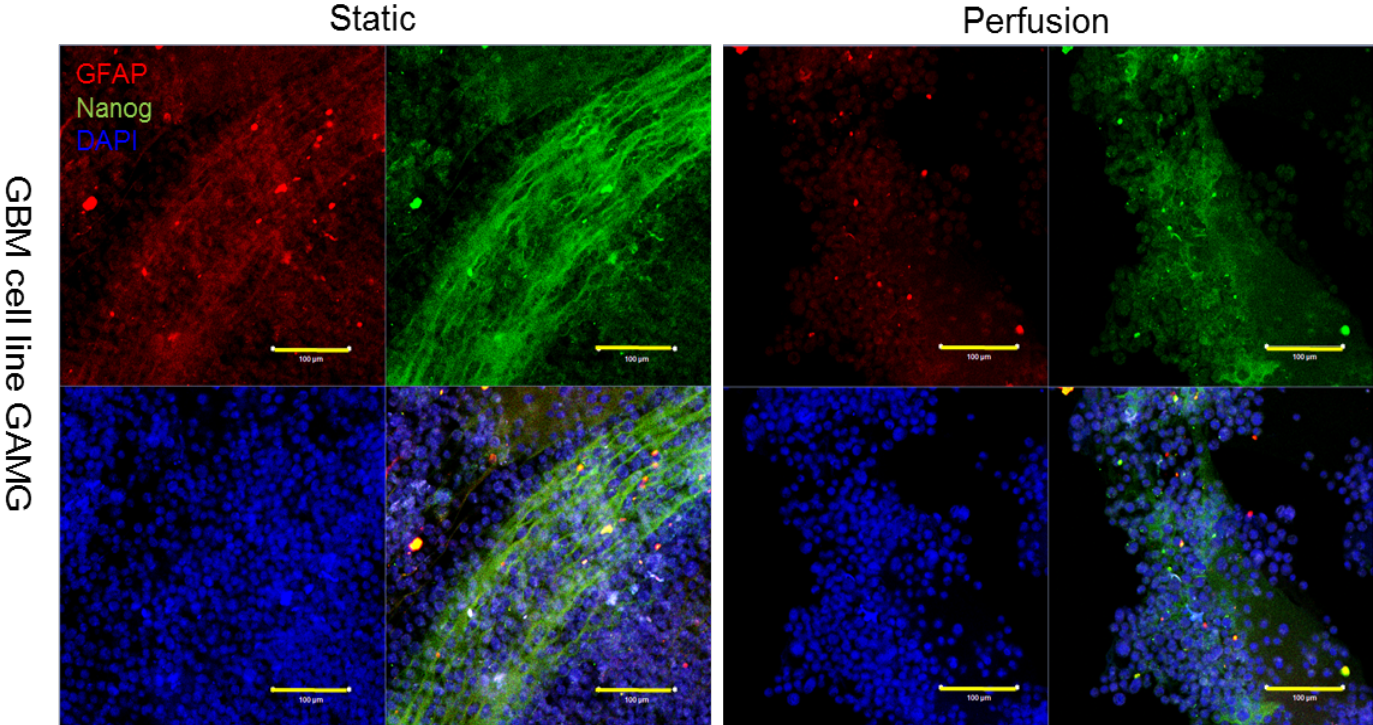

Supplement: 41598_2017_9686_MOESM1_ESM.pdf [file 41598_2017_9686_MOESM1_ESM.pdf]
